# Supplementary material for: Photoactivation of olfactory sensory neurons does not affect action potential conduction in individual trigeminal sensory axons innervating the rodent nasal cavity
Source: PLoS One. 2019 Aug 14;14(8):e0211175. doi: 10.1371/journal.pone.0211175 (PMC6693769; doi:10.1371/journal.pone.0211175)
Supplement: S2 Table — (XLSX) [file pone.0211175.s002.xlsx]

## Sheet: Summary_Fig3-panels D,E,K
Date	Stimulus	Unit	Latency (s)	Distance to recording electrode (mm)	Conduction velocity (m.s-1)		Heat threshold	Cooling threshold		Von Frey stimulation		PEA	Capsaicin	Menthol	Ally isothiocyanante	Cyclohexanone	Icilin	NH4Cl		Background
2017-03-03	Electrical	U1	0.054	26	0.481481											+
	Electrical	U2	0.012	23.01	1.9175
	Electrical	U4	0.027	16.64	0.616296											+
2017-03-09	Electrical	U5	0.044	22.75	0.517045		38°C
	Electrical	U5	0.04	22.75	0.56875
2017-03-14	Electrical	U6	0.035	14.56	0.416
	Electrical	U7	0.017	21.19	1.24647
	Electrical	U7	0.02	21.19	1.0595
2017-03-16	Electrical	U8	0.035	13.65	0.39		35°C									+
2017-03-21	Electrical	U9	0.035	11.96	0.341714
2017-03-22	Electrical	U10	0.03	12.87	0.429
2017-03-29	Electrical	U11	0.009	5.33	0.592222
	Electrical	U11	0.011	5.33	0.484545
	Electrical	U11	0.014	5.33	0.380714
	Electrical	U12	0.021	8.19	0.39
	Electrical	U13	0.013	7.02	0.54
	Electrical	U13	0.019	7.02	0.369474		39°C
	Electrical	U14	0.014	6.24	0.445714									+
2017-04-06	Electrical	U15	0.009	6.37	0.707778
	Electrical	U15	0.014	6.37	0.455
	Electrical	U15	0.016	6.37	0.398125
	Electrical	U16	0.016	13.91	0.869375
	Electrical	U16	0.021	13.91	0.662381
2017-04-13	Electrical	U17	0.021	11.7	0.557143
	Electrical	U17	0.023	11.7	0.508696
	Electrical	U18	0.012	11.57	0.964167
	Electrical	U18	0.026	11.57	0.445
	Electrical	U19	0.018	13.52	0.751111		39°C
	Electrical	U19	0.024	13.52	0.563333		39°C									+
2017-04-20	Electrical	U20	0.04	12.35	0.30875											+
2017-05-30	Electrical	U21	0.026	12.09	0.465
	Electrical	U22	0.014	10.53	0.752143															29.5°C
2017-10-18	Mechanical	M1	0.008	20.8	2.6
	Mechanical	M2	0.01	20.8	2.08
	Mechanical	M3	0.006	20.8	3.46667
	Mechanical	M4	0.02	20.8	1.04
	Mechanical	M5	0.004	20.8	5.2
	Mechanical	M6	0.009	20.8	2.31111													+		27°C
	Mechanical	M6	0.013	20.8	1.6			24°
	Mechanical	M6	0.019	20.8	1.09474		41°C											+
2018-01-30	Mechanical	M10	0.032	18.46	0.576875		31°C					0								24°C & 22°C
2018-01-31	Mechanical	M11	0.015	4.42	0.294667
	Mechanical	M12	0.02	10.14	0.507
	Mechanical	M13	0.013	11.31	0.87		25°C													28°C
2018-02-01	Mechanical	M14	0.009	14.3	1.58889
	Mechanical	M14	0.022	14.3	0.65
	Mechanical	M15	0.012	14.3	1.19167			24°C
2018-02-06	Mechanical	M16	0.04	19.89	0.49725			24°C												23.5°C
2018-02-07	Mechanical	M17	0.043	9.23	0.214651
	Mechanical	M18	0.034	10.66	0.313529
	Mechanical	M19	0.039	10.79	0.276667
2018-02-13	Mechanical	M20	0.014	21.06	1.50429															22°C
	Mechanical	M20	0.02	21.06	1.053
	Mechanical	M20	0.041	21.06	0.513659
2018-02-14	Mechanical	M21	0.026	10.01	0.385
	Mechanical	M22	0.011	11.57	1.05182			24°C
2018-03-14	Mechanical	M23	0.035	11.44	0.326857
	Mechanical	M24	0.04	11.44	0.286
2018-03-23	Mechanical	M25	0.01	10.14	1.014
	Mechanical	M25	0.02	10.14	0.507
	Mechanical	M26	0.007	8.71	1.24429		27°C
	Mechanical	M26	0.015	8.71	0.580667			22°C					+
	Mechanical	M26	0.022	8.71	0.395909
2018-03-29	Mechanical	M30	0.011	16.77	1.52455
	Mechanical	M30	0.016	16.77	1.04812			24°C
2018-04-04	Mechanical	M31	0.029	20.28	0.69931
	Mechanical	M31	0.04	20.28	0.507
	Mechanical	M32	0.038	10.92	0.287368
2018-04-14	Mechanical	M33	0.006	12.61	2.10167												+
	Mechanical	M33	0.015	12.61	0.840667		28°C	24°C
	Mechanical	M33	0.02	12.61	0.6305
2017-11-23	Mechanical	ME1	0.017	18.46	1.08588
	Mechanical	ME2	0.03	22.62	0.754
2018-04-27	Electrical	U01	0.04	8.97	0.22425
2018-05-18	Electrical	U02	0.037	8.71	0.235405		31°C	26°C												28.5°C
	Electrical	U03	0.034	10.53	0.309706			24°C							+		+			26°C
2018-05-22	Electrical	U04	0.014	4.16	0.297143			23°C					+
	Electrical	U05	0.028	9.75	0.348214							0								25 & 29°C
2016-05-04	Electrical	U7	0.017	10.38	0.610588					+		0
2016-05-10	Electrical	Nase1a/U8	0.006	6	1					+		0						+
	Electrical	Nase1a/U8	0.003	6	2					+		0						+
	Electrical	Nase2/U9	0.016	6.8	0.425		44°C			+		0			+
2017-08-07	General																			32°C
2018-02-16	General																			27°C

## Sheet: Fig3-panel B
		all	Elec	Mech
0.2	0 - 0.2
	0.2 - 0.4	21	12	9
0.6	0.4 - 0.6	23	16	7
	0.6 - 0.8	10	6	4
1	0.8 - 1	5	3	2
	1 - 1.2	9	1	8
1.4	1.2 - 1.4	2	1	1
	1.4 - 1.6	4		4
1.8	1.6 - 1.8
	1.8 - 2	2	2
2.2	2 - 2.2	2		2
	2.2 - 2.4	1		1
2.6	2.4 - 2.6	1		1
	2.6 - 2.8
3	2.8 - 3
	3 - 3.2
3.4	3.2 - 3.4
	3.4 - 3.6	1		1
3.8	3.6 - 3.8
	3.8 - 4
4.2	4 - 4.2
	4.2 - 4.4
4.6	4.4 - 4.6
	4.6 - 4.8
5	4.8 - 5
	5 - 5.2	1		1
5.4	5.2 - 5.4
	5.4 - 5.6
		82	41	41

## Sheet: Figure 4
PEA								Capsaicin								Menthol								Allyl isothiocyanante								Cyclohexanone								Icilin								Ammonium chloride
Unit	Time (s)	Baseline latency (s)	Averaged latency baseline	Time (s)	PEA latency (s)	Normalized Baseline latency	Normalized PEA latency	Unit	Time (s)	Baseline latency (s)	Averaged latency baseline	Time (s)	Capsaicin latency (s)	Normalized Baseline latency	Normalized Capsaicin latency	Unit	Time (s)	Baseline latency (s)	Averaged latency baseline	Time (s)	Menthol latency (s)	Normalized Baseline latency	Normalized Menthol latency	Unit	Time (s)	Baseline latency (s)	Averaged latency baseline	Time (s)	AITC latency (s)	Normalized Baseline latency	Normalized AITC latency	Unit	Time (s)	Baseline latency (s)	Averaged latency baseline	Time (s)	Cyclo latency (s)	Normalized Baseline latency	Normalized Cyclo latency	Unit	Time (s)	Baseline latency (s)	Averaged latency baseline	Time (s)	Icilin latency (s)	Normalized Baseline latency	Normalized Icilin latency	Unit	Time (s)
Nase2	1740.97		0.0149117	1920.99	0.014285		0.957975	M26	7983.96	0.010085	0.0103083	8003.96	0.01069	0.978335	1.03703	U14	1944		0.0140617	2124.01	0.014665		1.04291	U03	2232.21	0.0342	0.034025	2632.22	0.04652	1.00514	1.36723	U1	1557.84		0.0593283	1825.87	0.07422		1.251	M33	2176.53	0.011725	0.011665	2476.55	0.013495	1.00514	1.15688	M6	1921.93
	1742.97	0.014865		1922.99	0.01483	0.99687	0.994523		7988.96	0.010475		8008.96	0.01027	1.01617	0.996281		1948			2128.01	0.01564		1.11224		2237.21	0.03391		2637.23	0.048745	0.99662	1.43262		1559.84			1827.87					2186.53	0.011635		2486.55	0.013755	0.997428	1.17917		1925.93
	1744.97	0.014705		1924.99		0.986141			7993.96			8013.96					1952			2132.01					2242.21	0.033965		2642.23	0.04593	0.998237	1.34989		1561.84			1829.87					2196.53	0.011635		2496.56	0.01357	0.997428	1.16331		1929.93
	1746.97			1926.99					7998.96	0.010365		8018.96	0.01036	1.0055	1.00501		1956			2136.01				Nase2	8455.71	0.01561	0.0154	8631.73	0.017165	1.01364	1.11461		1563.84			1831.87				U03	462.138	0.028375	0.0283033	742.149	0.0382	1.00253	1.34966		1933.93
	1748.97	0.015165		1928.99	0.01453	1.01699	0.974405	U04	7606.63	0.012785	0.0127867	7931.64	0.014625	0.99987	1.14377		1960	0.014045		2140.01		0.998815			8457.71	0.015225		8633.73	0.01727	0.988636	1.12143		1565.84			1833.87					467.138	0.028225		747.149	0.037585	0.997232	1.32794		1937.93
Nase1	1682.94	0.0025	0.002495	1884.96	0.002525	1.002	1.01202		7611.63	0.0128		7936.64	0.014835	1.00104	1.16019		1964	0.01395		2144.01		0.992059			8459.71	0.015365		8635.73	0.01724	0.997727	1.11948		1567.84			1835.87					472.138	0.02831		752.15	0.03876	1.00024	1.36945	M6	1945.94
	1684.94	0.00245		1886.96	0.00247	0.981964	0.98998		7616.63	0.012775		7941.64	0.01492	0.999088	1.16684		1968	0.01419		2148.01	0.01485	1.00913	1.05606										1569.84			1837.87													1949.94
	1686.94	0.002535		1888.96	0.00242	1.01603	0.96994																										1571.84			1839.87	0.07441		1.25421										1953.94
Nase1	4675.27	0.002905	0.00287667	4751.28	0.00275	1.00985	0.955968																										1573.84			1841.87													1957.95
	4677.27	0.002825		4753.28	0.00275	0.982039	0.955968																										1575.84			1843.87													1961.95
	4679.27	0.0029		4755.28	0.002695	1.00811	0.936848																										1577.84	0.058905		1845.87		0.992865											1965.95
U05	4286.27	0.02181	0.02166	4461.28	0.0222	1.00693	1.02493																										1579.84	0.05957		1847.87		1.00407											1969.95
	4291.27	0.02148		4466.28	0.022415	0.99169	1.03486																										1581.84	0.05951		1849.87	0.074955	1.00306	1.26339									Nase1	2024.98
	4296.27	0.02169		4471.28	0.02218	1.00139	1.02401																									U4	3561.25	0.02607	0.0260283	3625.26	0.026855	1.0016	1.03176										2026.98
M10	111.243	0.030095	0.0301083	231.25	0.031605	0.999557	1.04971																										3565.25	0.02589		3629.26	0.02727	0.994685	1.0477										2028.98
	116.243	0.02997		236.25	0.031105	0.995405	1.0331																										3569.25	0.026125		3633.26	0.02908	1.00371	1.11724									Nase1	2030.98
	121.244	0.03026		241.25	0.03136	1.00504	1.04157																									U8	3426.59	0.036125	0.0359333	3522.59		1.00533											2032.98
																																	3430.59	0.03586		3526.59	0.037745	0.997959	1.05042										2034.98
																																	3434.59			3530.59	0.03966		1.10371
																																	3438.59	0.035815		3534.59	0.040715	0.996707	1.13307
																																U19	4400.28	0.018415	0.018545	4956.31	0.020395	0.99299	1.09976
																																	4404.28	0.01837		4960.31		0.990563
																																	4408.28			4964.31	0.01994		1.07522
																																	4412.28	0.01885		4968.31	0.019235	1.01645	1.03721
																																U20	8815.59	0.062165	0.0622883	8987.6	0.06608	0.99802	1.06087
																																	8819.59			8991.6	0.066065		1.06063
																																	8823.59			8995.6
																																	8827.59	0.06217		8999.6	0.065345	0.9981	1.04907
																																	8831.59	0.06253		9003.6		1.00388
Average						1	0.997054	Average						1	1.08485	Average						1	1.0704	Average						1	1.25088	Average						1	1.10902	Average						1	1.25773	Average
St dev						0.0107327	0.0356309	St dev						0.0112765	0.0734577	St dev						0.00701807	0.0300686	St dev						0.00775923	0.134761	St dev						0.00630451	0.0789706	St dev						0.00299476	0.092304	St dev
[truncated: 6 more columns]
